# Supplementary material
Source: MDPI journal article supplement (https://www.mdpi.com/2071-1050/15/14/10747)
Supplement: s1 [file s1 › sustainability-2449954-supplementary.pdf]

# Supplementary Material

## Questionnaire

### *Socio-demographic and professional information*

1. Gender
  - Male
  - Female
2. Age
  - Less than 28
  - 29-39
  - 40-49
  - 50-59
  - More than 60
3. In which school do you teach?
  - Primary school
  - Middle school
4. How many years has he been teaching?
  - For 5 years or less
  - Between 6 and 10
  - Between 11 and 15
  - Between 16 and 20
  - Between 20 and 25
  - Between 26 and 30
  - Over 30 years
5. Where is located the school where you teach?
  - North East
  - North West
  - Centre
  - South
  - Islands
6. Before the pandemic, did you receive specific training on methodologies for distance learning?
  - Yes
  - Little
  - No
- 6a. If yes, please specify the type of training received.

### *Experiences and perceptions of distance learning*

7. How much did you feel prepared to use distance learning before the COVID-19 pandemic?
- For nothing
  - Little
  - Enough
  - A lot
  - Very much
8. Currently, how do you feel prepared to deal with distance learning?
- For nothing
  - Little
  - Enough
  - A lot
  - Very much
9. At the beginning of the COVID-19, what knowledge did you have on apps/tools/platforms that you used for online learning?
- Very good
  - Good
  - Sufficient
  - Insufficient
  - Nothing
10. Did you receive specific training in using apps/tools/platforms?
- Yes
  - No
- 10a. If yes, please specify the type of training received
11. How do you evaluate your experience with distance learning?
- Very positive
  - Positive
  - Neutral
  - Negative
  - Very negative
12. Please, briefly describe the reasons for your answer to the previous question.
13. How do you evaluate the experience of your students with distance learning?
- Very positive
  - Positive
  - Neutral
  - Negative
  - Very negative
14. Please, briefly describe the reasons for the answer given to the previous question.
15. In your opinion, what are the potential positive factors of distance learning?
- Flexibility to provide education and access content and resources

- Removal of space and time barriers
- Ability to record and review lessons
- Better results in assimilating information
- Ability to customize and adapt courses to the needs of learners
- Student centrality
- Motivate students to participate (e.g. shy kids) and to exchange points of view and ideas
- Facilitate collaboration
- Allow students to learn at their own pace
- Enable faster learning
- Increased student attention
- Other

16. If there were technical difficulties with distance learning, can you indicate which ones were for your students?

- Internet connection problems
- Lack of suitable devices (e.g. smartphone)
- Limited availability of hardware devices (need to share them with other family members)
- Difficulty in using remote learning platforms
- Inadequate platforms used
- No or limited technical assistance

17. If there were didactic difficulties with distance learning, can you indicate which ones were for your students?

- Lack or difficulty in finding structured material and content for e-learning
- Inadequate teacher-student interaction
- Lack of interaction/collaboration with peers
- Students' assessment
- Reduced attention compared to classroom lessons
- Home environment not suitable for distance learning
- Lack of parental or family support
- Other

#### *Social inclusion and involvement of students*

18. In your school, were actions taken to encourage the involvement and inclusion of students with limited access to technologies (network and devices) or with low digital skills?

- Yes
- No
- I don't know

18a. If yes, can you briefly describe them?

19. Can you indicate some best practices used during your experience with distance learning?

20. In your opinion, what should be done and why, to provide quality, equitable and inclusive education and learning opportunities for all through distance learning?

*Measures to be taken to improve distance learning*

21. On a scale of 1 to 5 (1. No priority 2. Low priority 3. Medium priority 4. High priority 5. Highest priority) please, indicate the priority you would assign to each of the following measures aimed at improving distance learning:

- Network infrastructure and Internet speed should be boosted to offer good connectivity.
- The devices (tablets, computers) should be cheaper to allow all families to buy them.
- Governments should give more incentives to households to buy devices such as tablets or computers.
- Access to the Internet or other necessary equipment should be ensured for all students.
- Teacher training courses are needed to improve technological and methodological skills concerning the new emerging models and approaches to distance learning.
- It is necessary to provide specific training to students on distance learning.
- More interactive e-learning platforms (videos, animations, quizzes, games, etc.) need to be developed to keep students' attention.
- New teaching methodologies need to be created to ensure the inclusion of all students.
- New methods for student assessment are needed.
- Technologies that use virtual and augmented reality should be improved by making them more accessible and therefore more engaging and inclusive.
- The use of smart technologies, such as artificial intelligence, should be strengthened to encourage personalized, inclusive and participatory online learning paths.

22. In a non-emergency condition, what teaching method you would prefer to adopt?

- Face-to-face
- Blended learning
- Online learning

22a. Can you specify the reasons for this choice?

23. Can you briefly describe what could be in the future the greatest opportunities for distance learning?

Thank you for participating in this survey!
